# Supplementary material
Source: MDPI journal article supplement (https://www.mdpi.com/2504-5377/5/3/37)
Supplement: s1 [file s1]

Archive with 2 entries (2 files):
- Supplementary Materials_10-06-2021.pdf
- Video S1.mp4
